# Supplementary material
Source: Royal Society of Chemistry journal article supplement (doi:10.1039/d6fo00638h)

## Mouse renal tissue

(CON,NPS,CUR,NPS+CUR-L,NPS+CUR-M,NPS+CUR-H)

### *inflammation*

#### 1.IKK

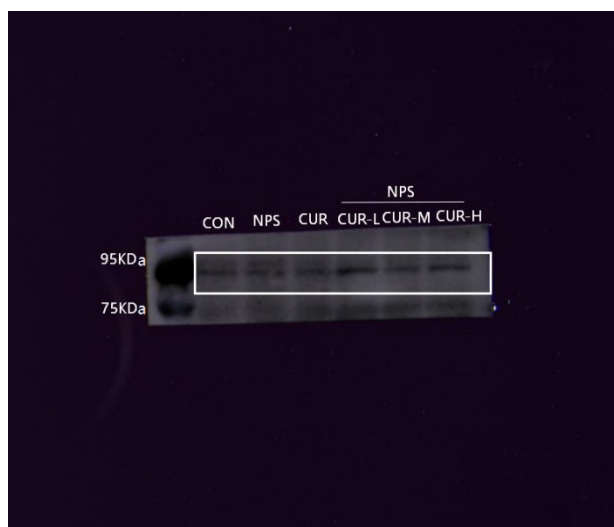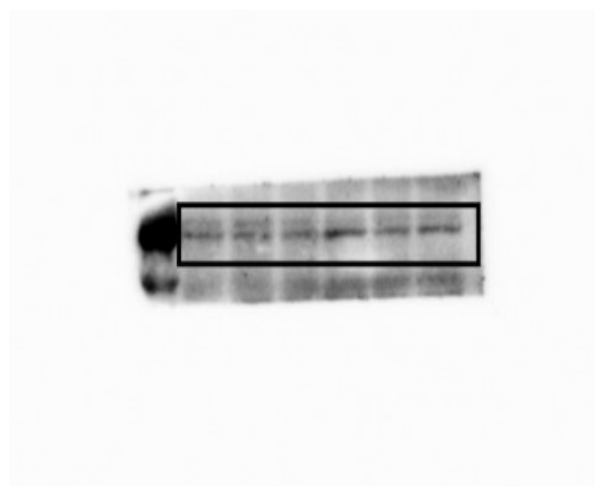

#### 2.P-IKK

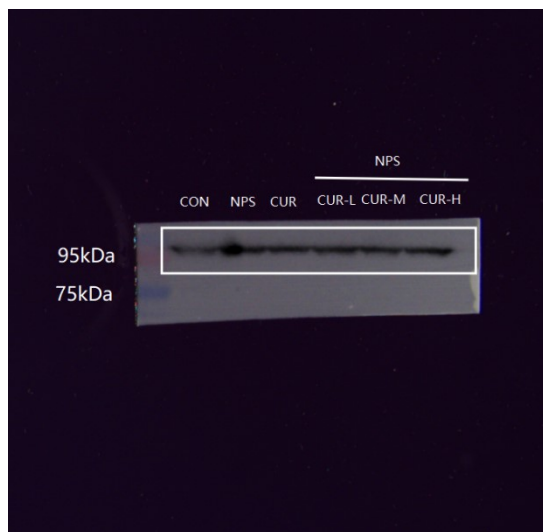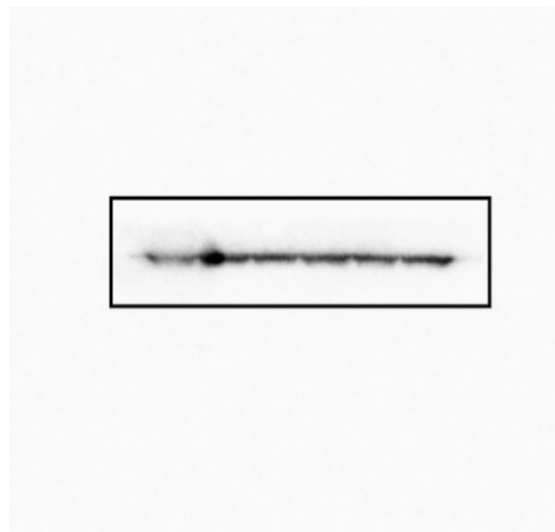

#### 3.P65

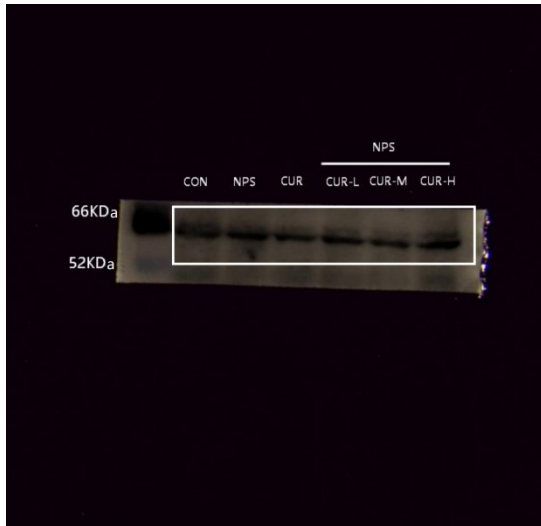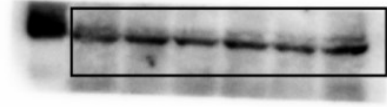

#### 4.P-P65

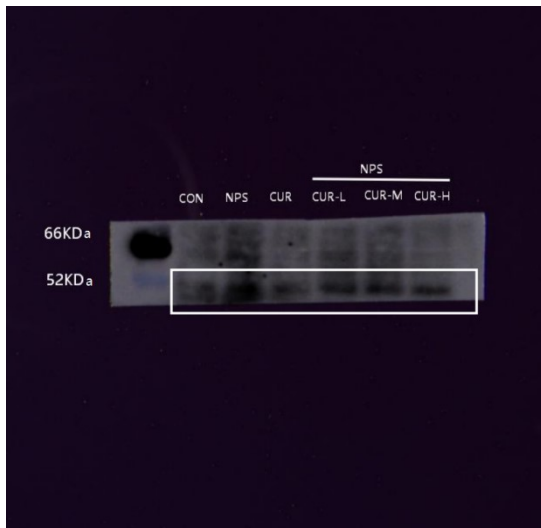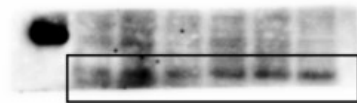

#### 5.IKB $\alpha$

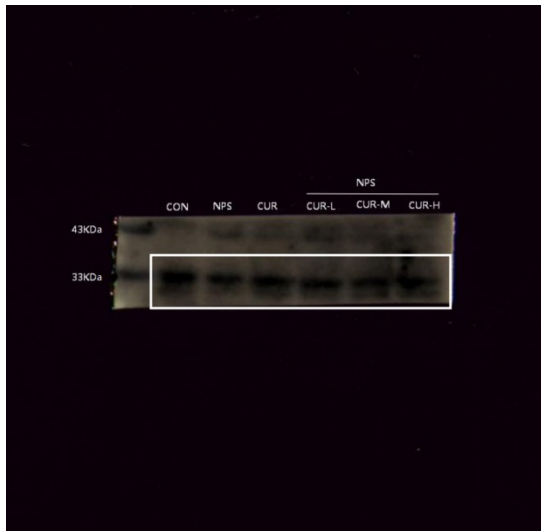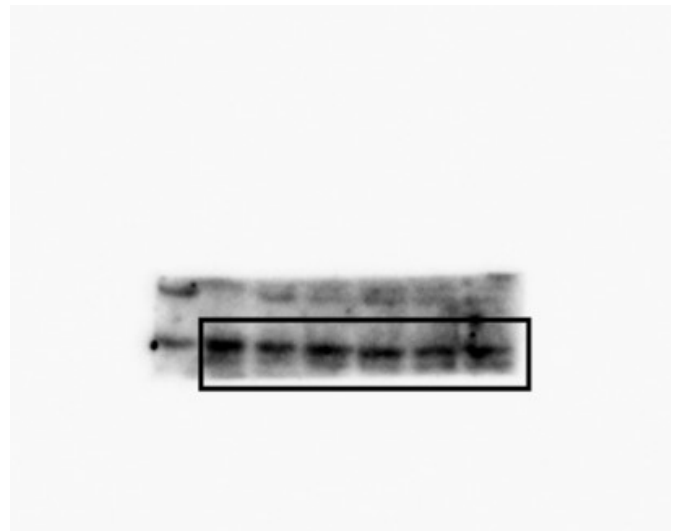

6.P-IKB  $\alpha$

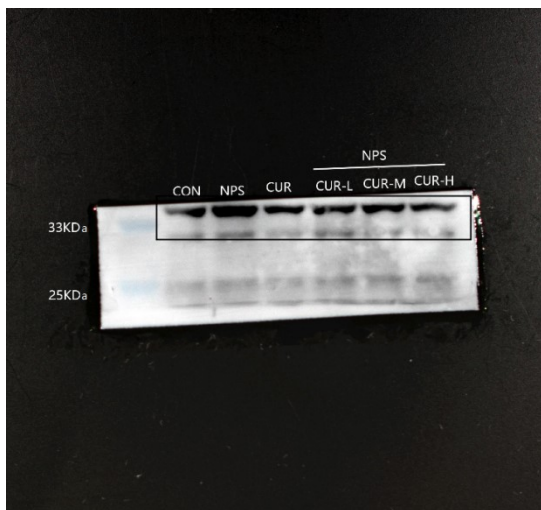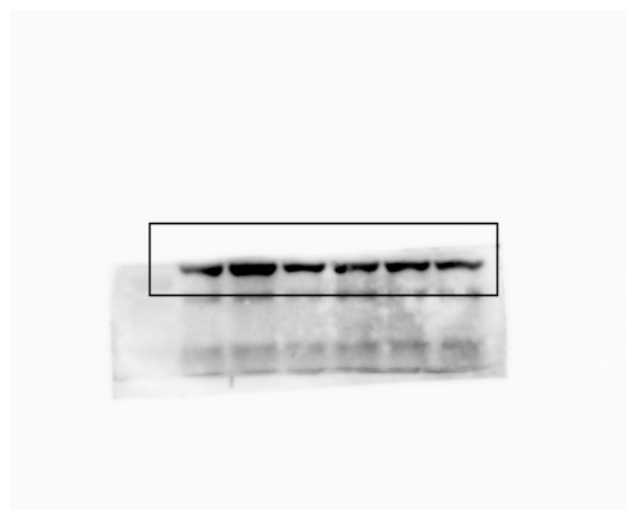

7.TNF-  $\alpha$

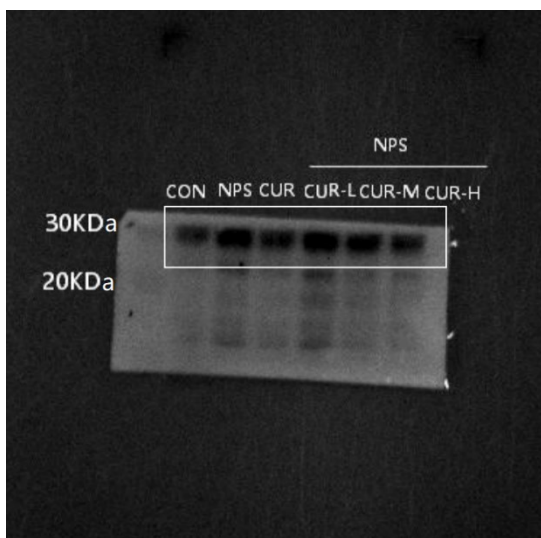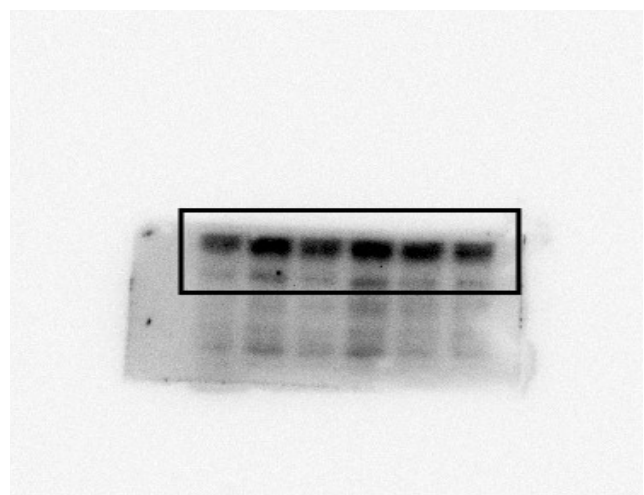

## 8. IL-1 $\beta$

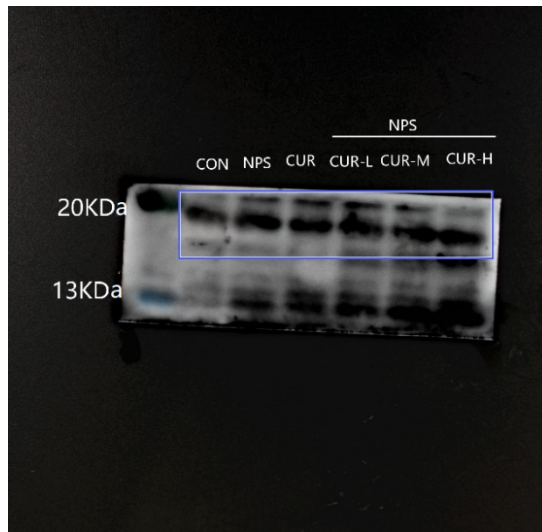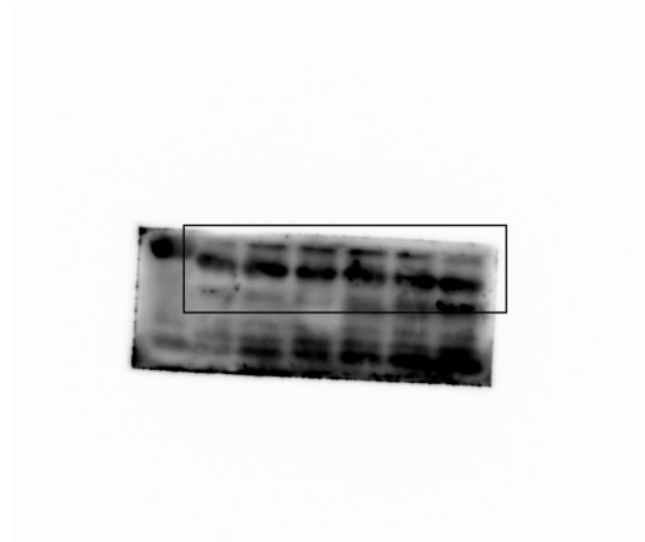

## 9. IL-6

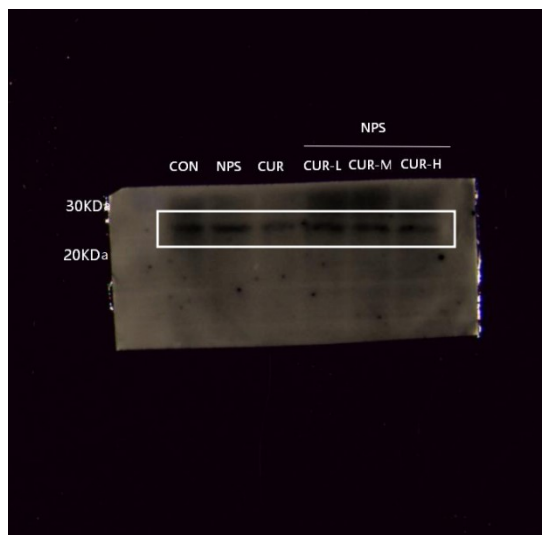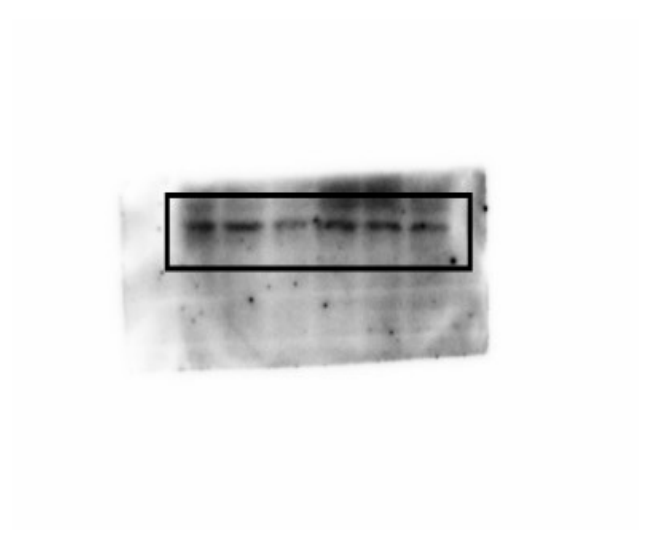

## 10. $\beta$ -actin

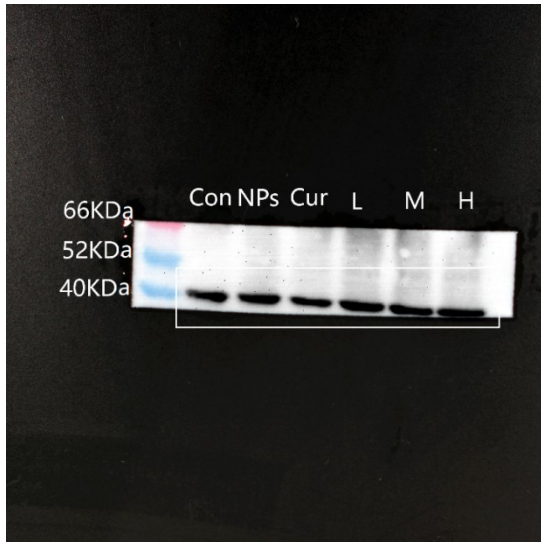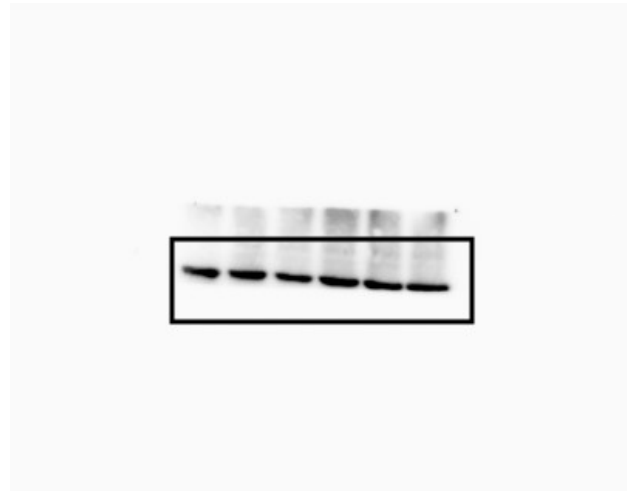

## Apoptosis

### 1. BAX

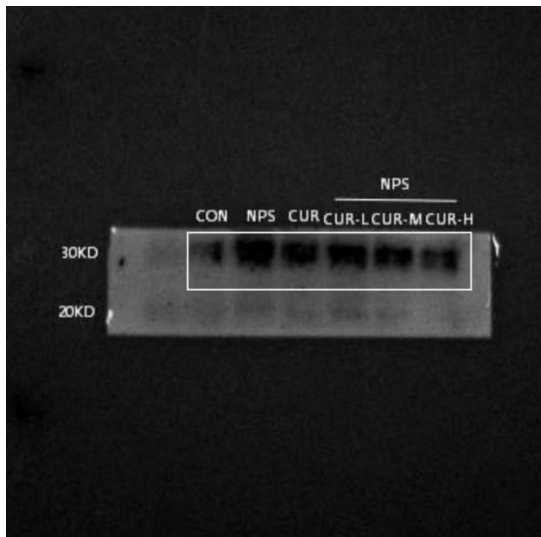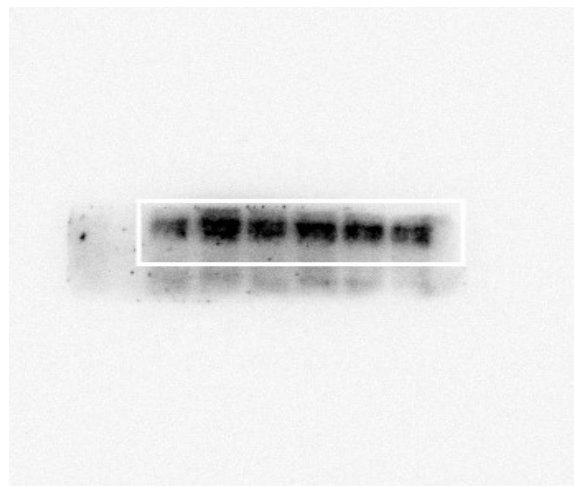

### 2. BCL-2

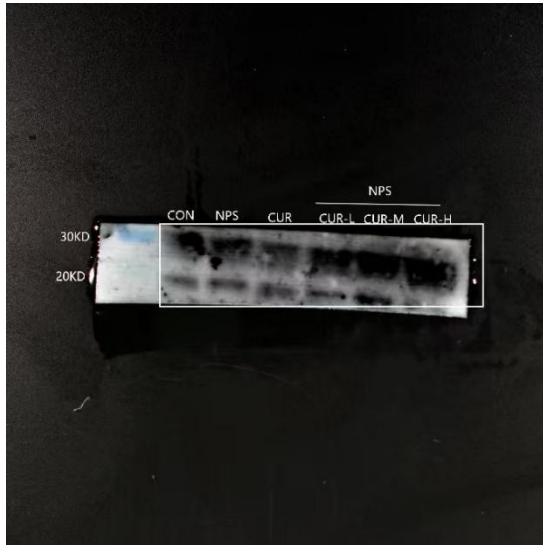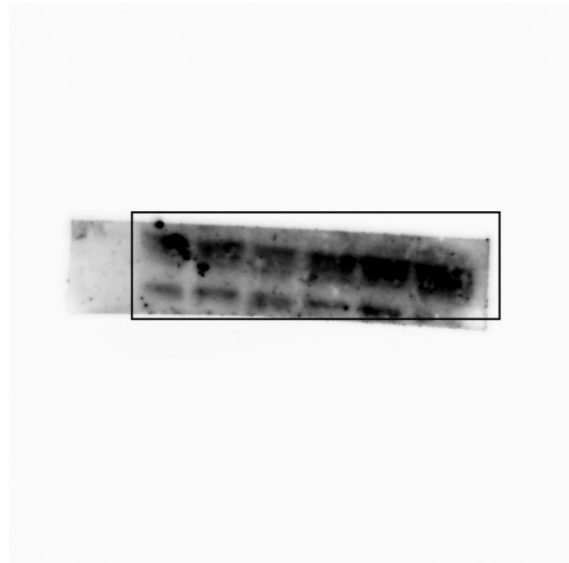

### 3.caspase-3

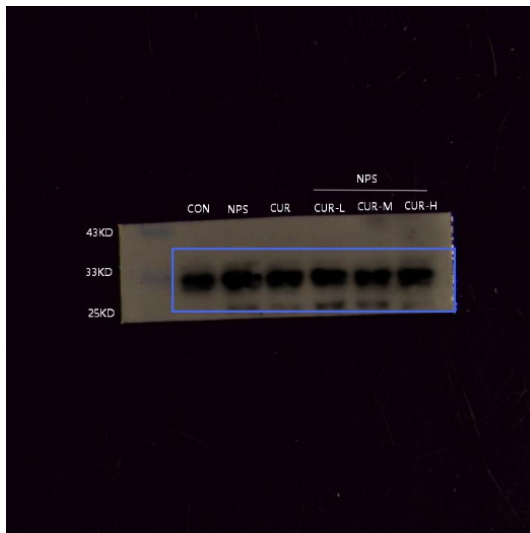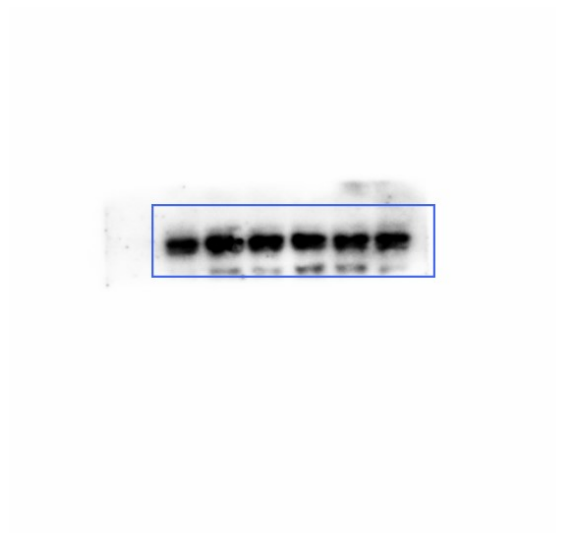

### 4.cleaved caspase 3

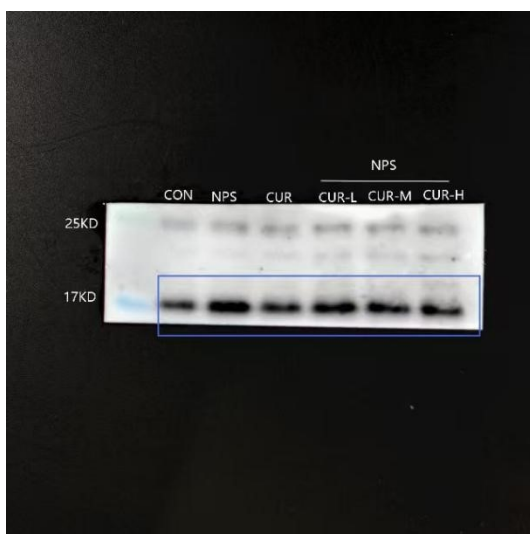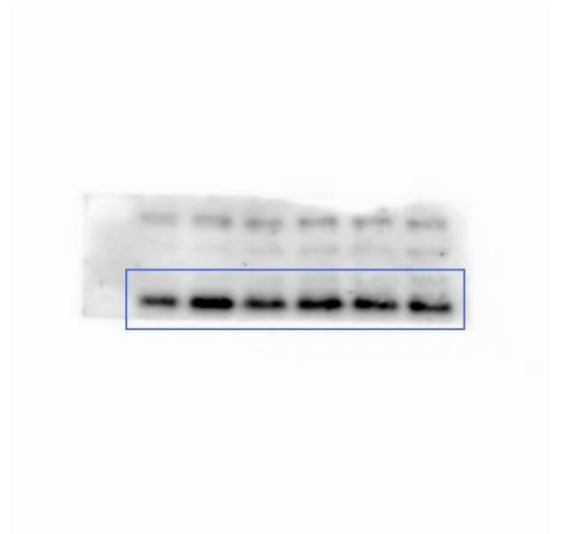

## 5. caspase-9

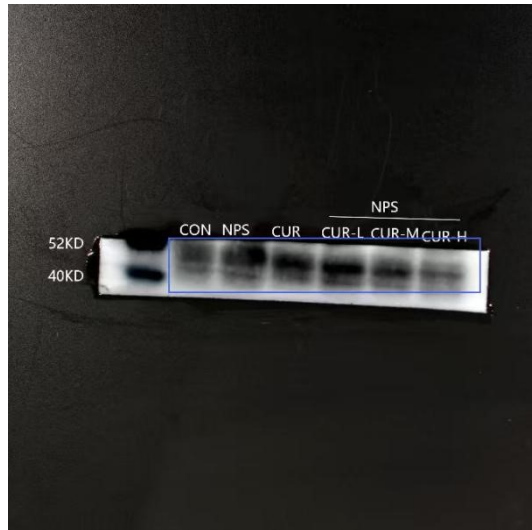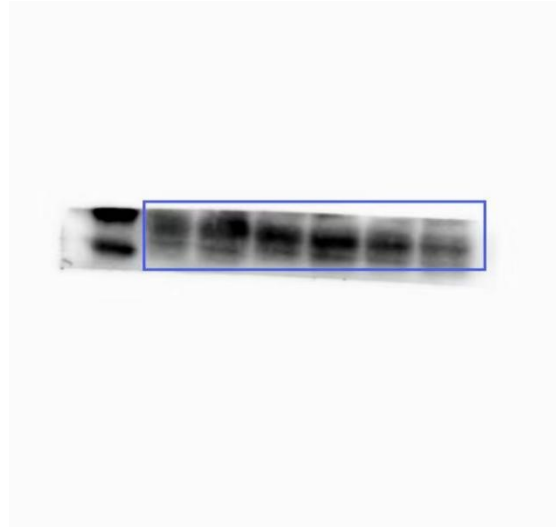

## 6. cleaved caspase-9

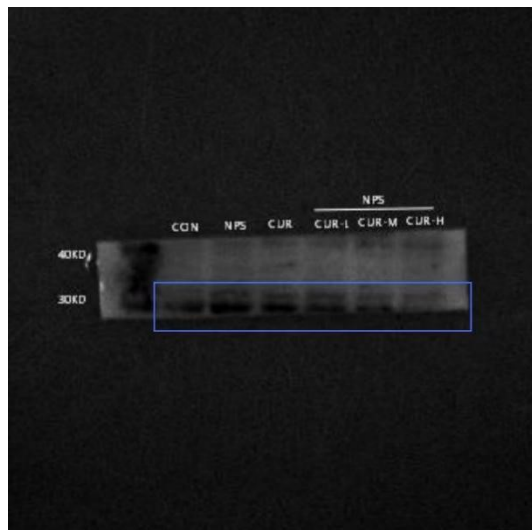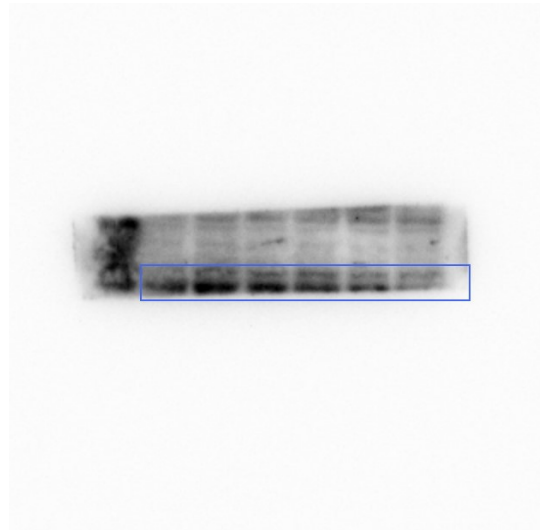

## 7. $\beta$ -actin

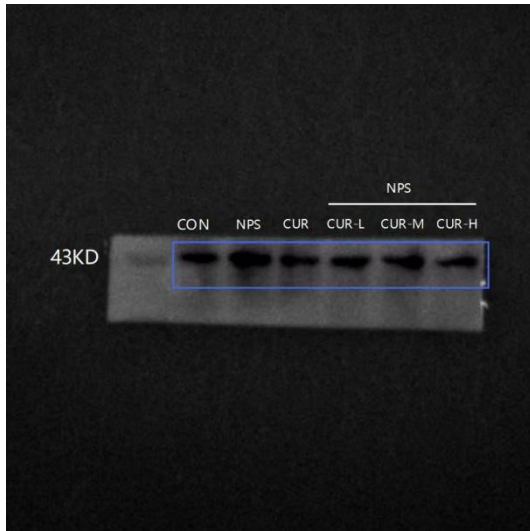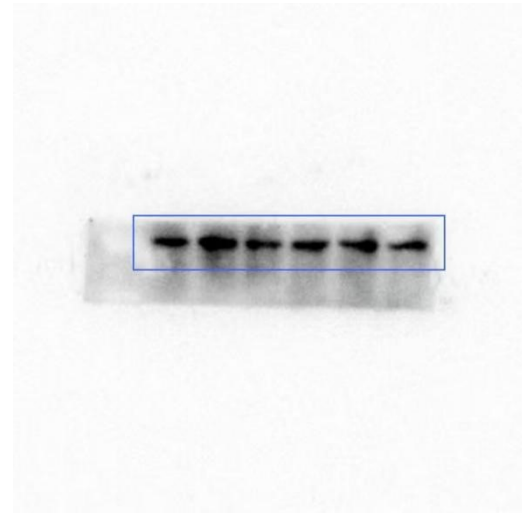

## *PI3K/AKT signaling pathway*

### 1.PI3K

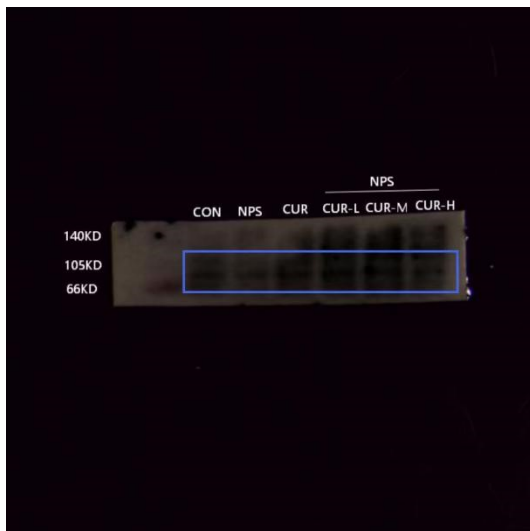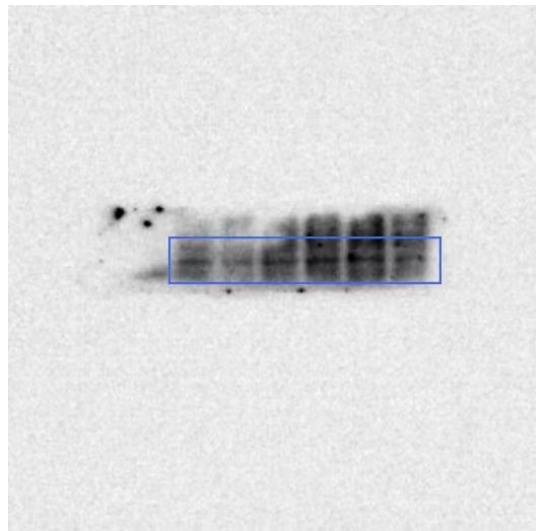

### 2.P-PI3K

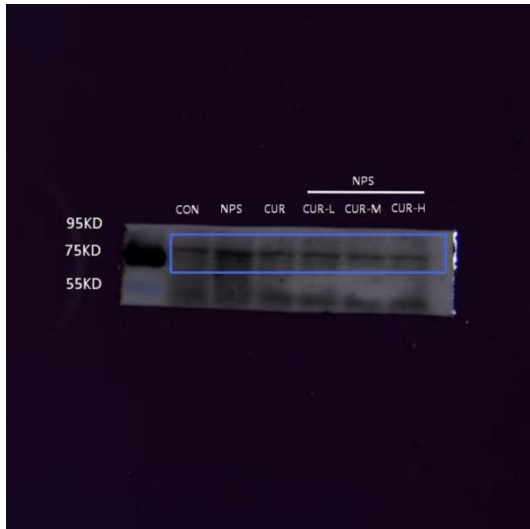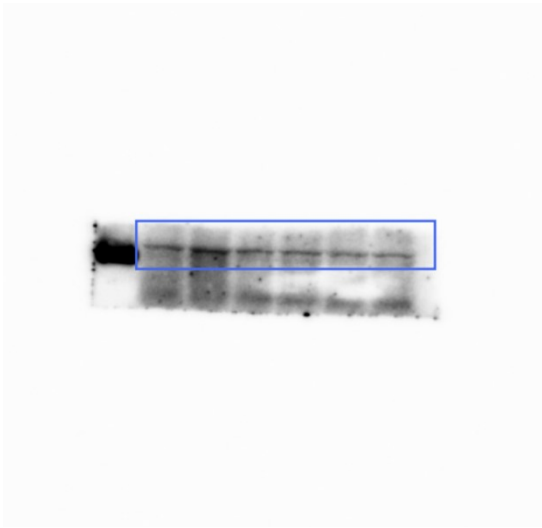

### 3.AKT

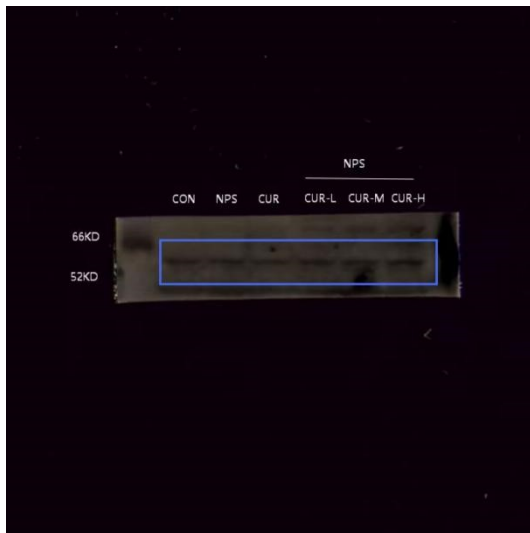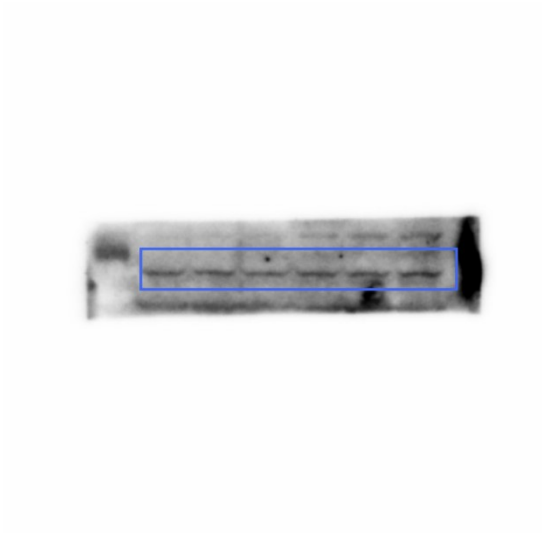

### 4.P-AKT

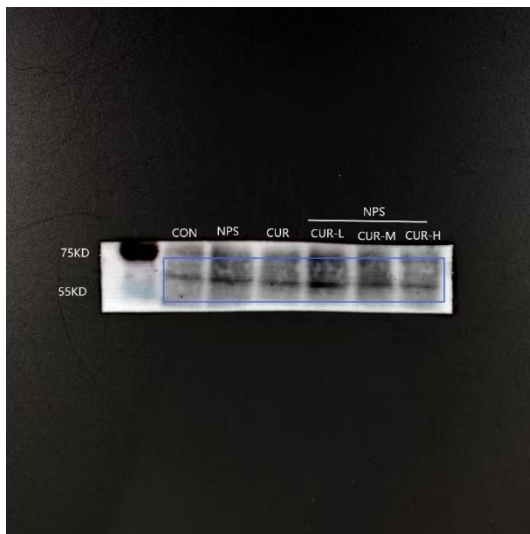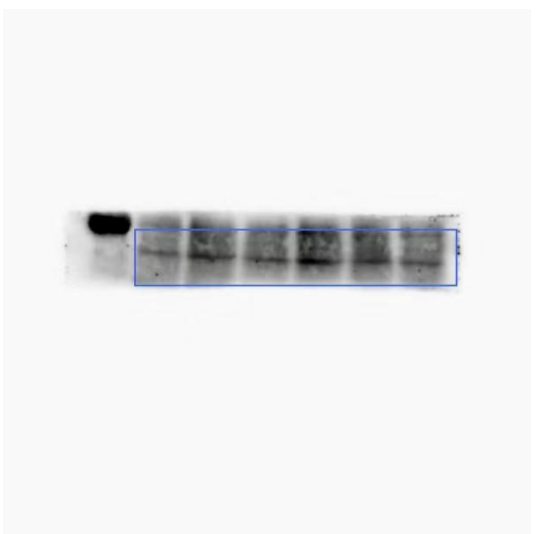

## 5. $\beta$ -actin

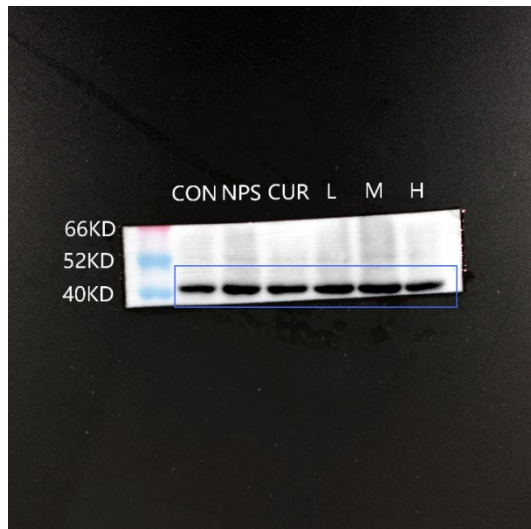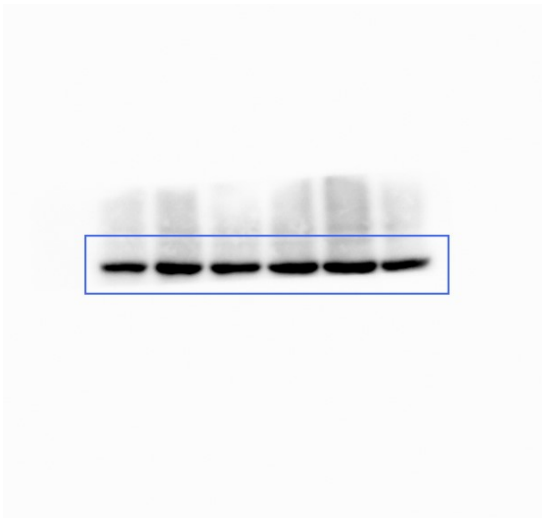

### *TCMK-1 cells*

*(CON, NPS, CUR, NPS+CUR, CUR+LY, NPS+CUR+LY)*

### *Signal pathway indicators*

#### 1. PI3K

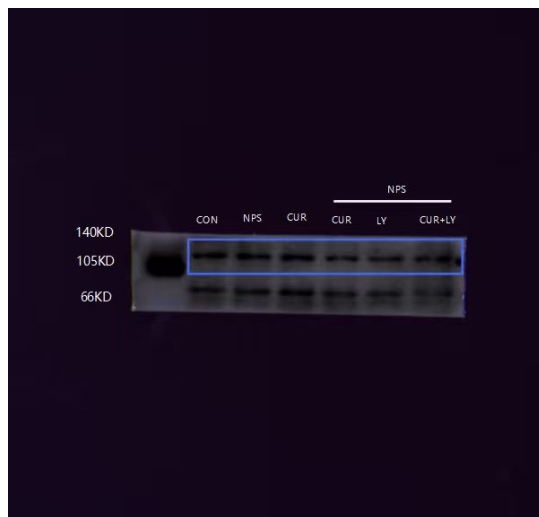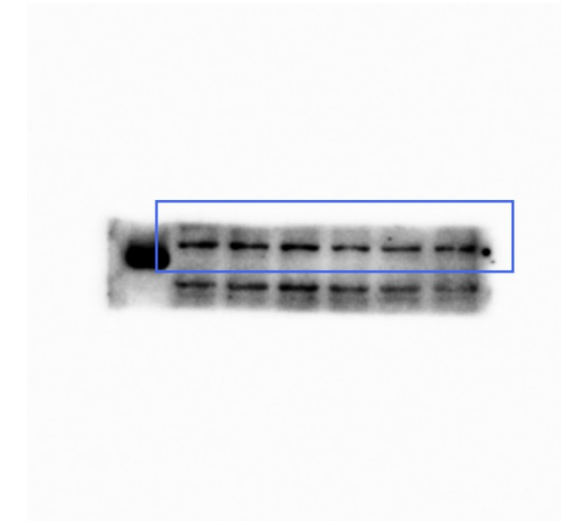

#### 2. P-PI3K

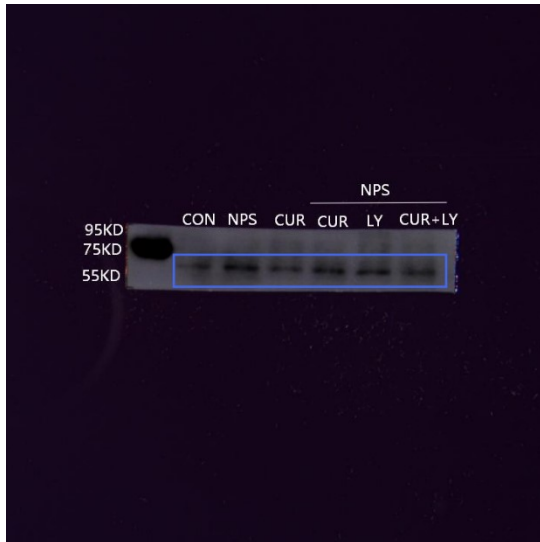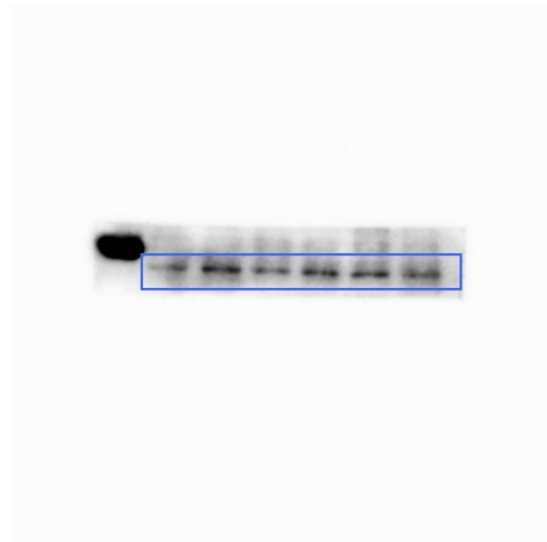

### 3.AKT

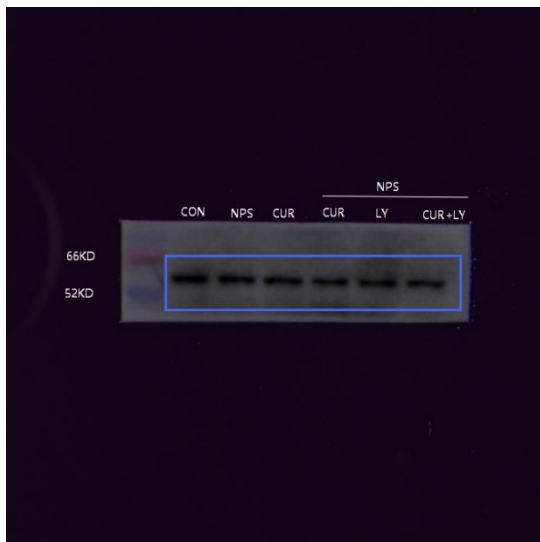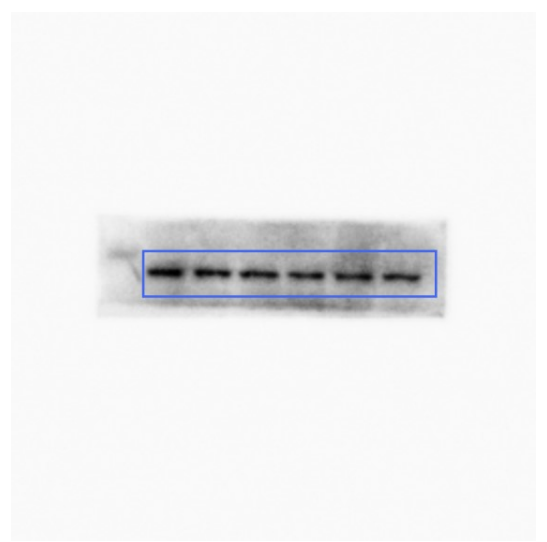

### 4.P-AKT

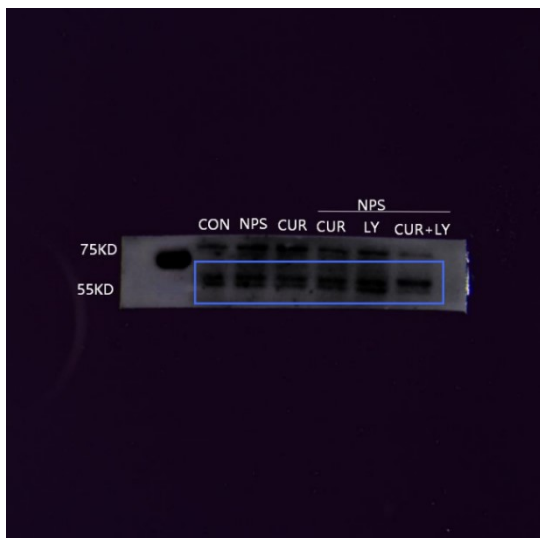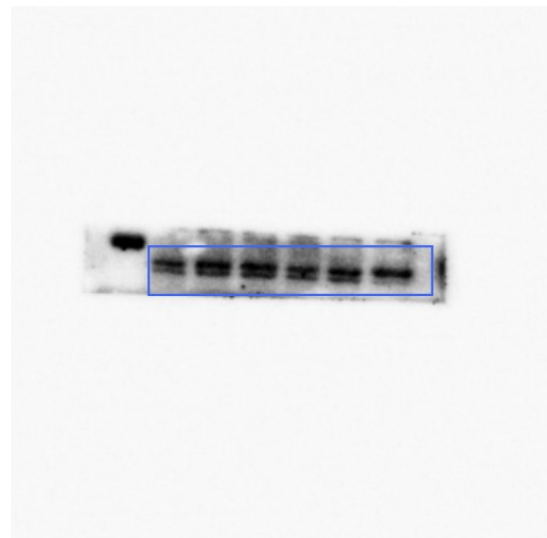

## 5.IKK

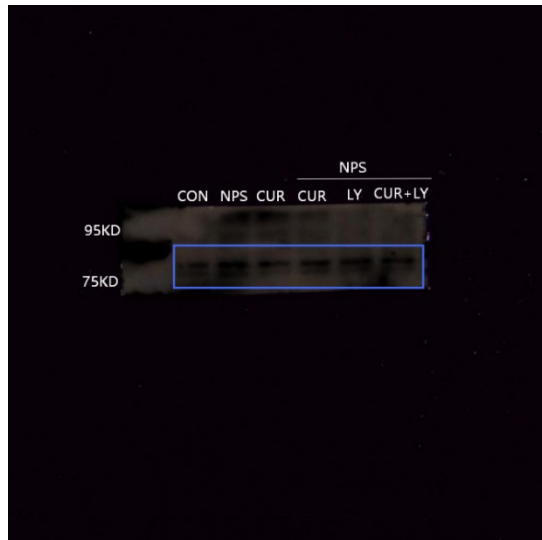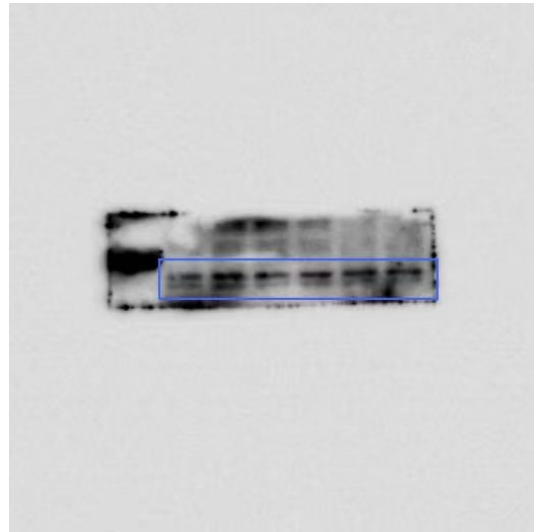

## 6.P-IKK

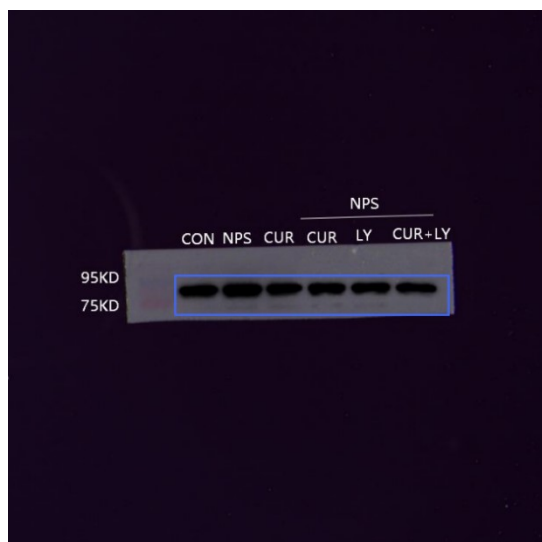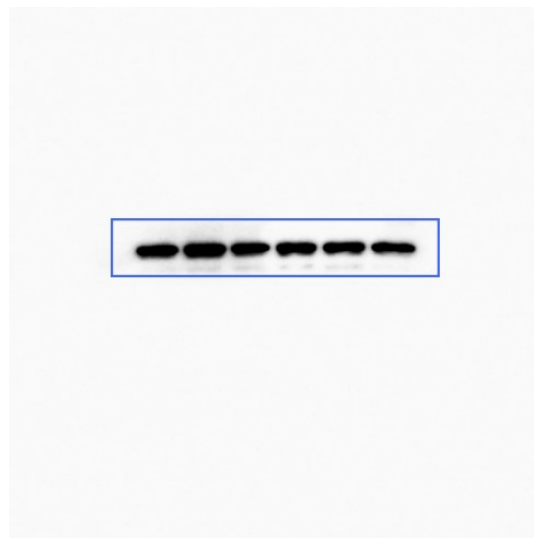

## 7.P65

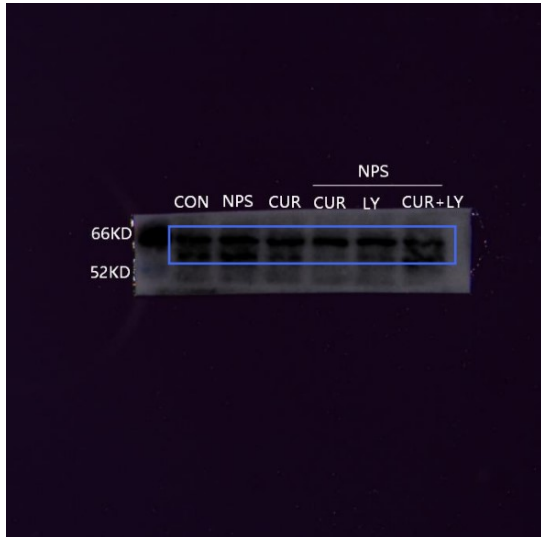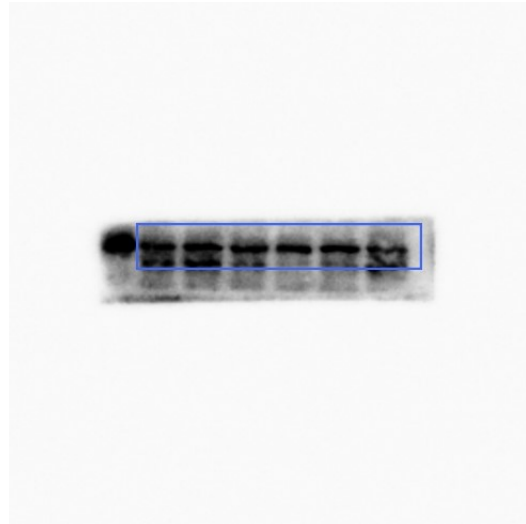

### 8.P-P65

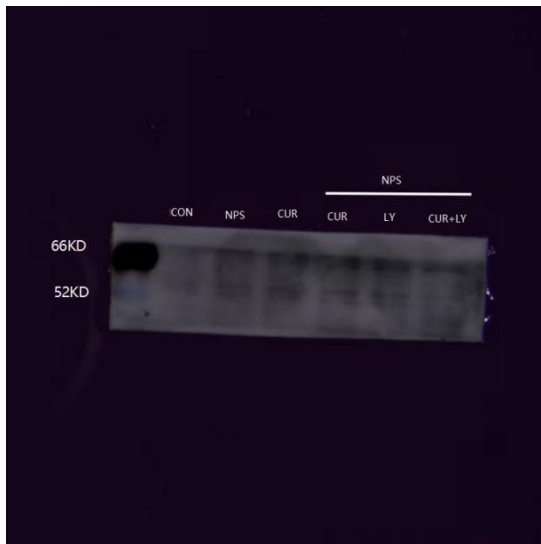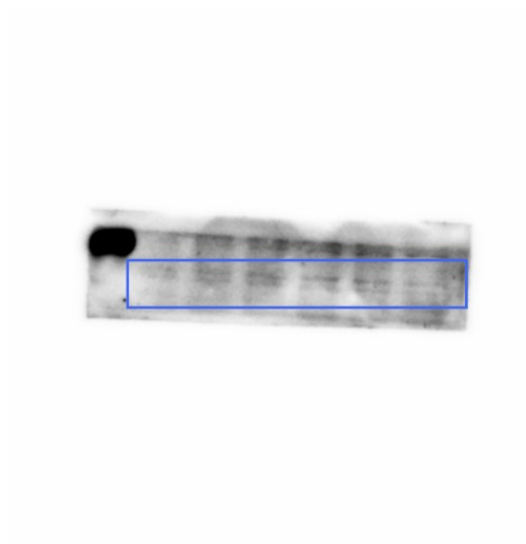

### 9. $\beta$ -actin

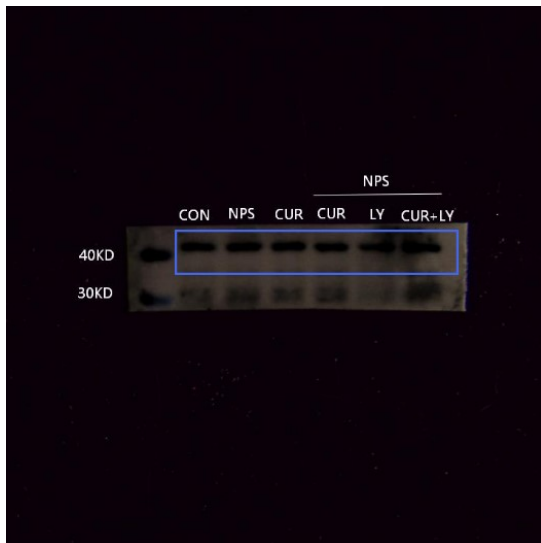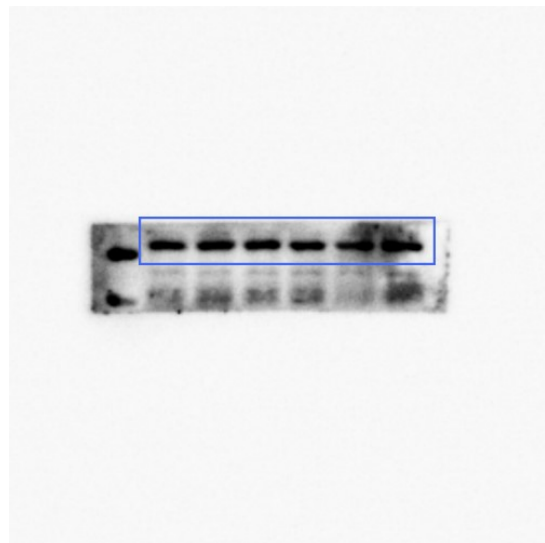

## *apoptosis markers*

### 1. BAX

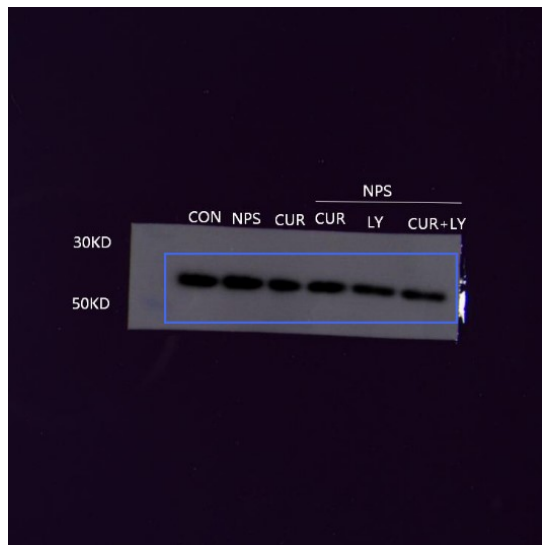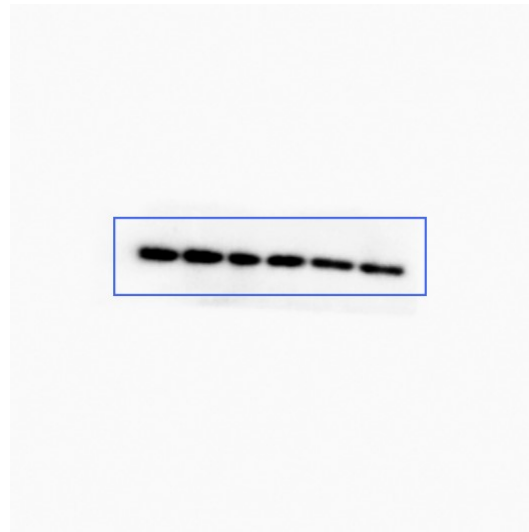

### 2. BCL-2

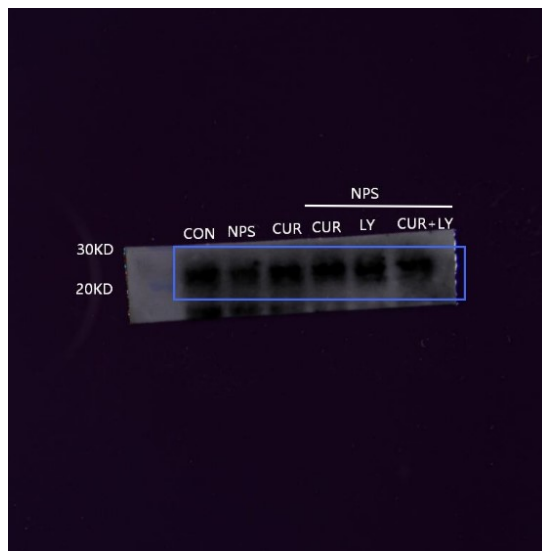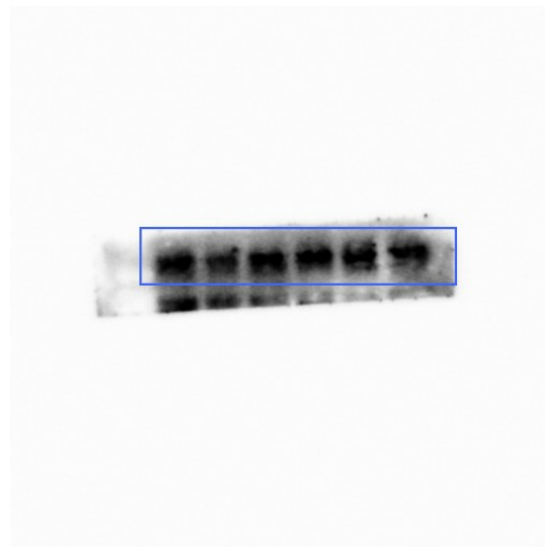

### 3. caspase-3

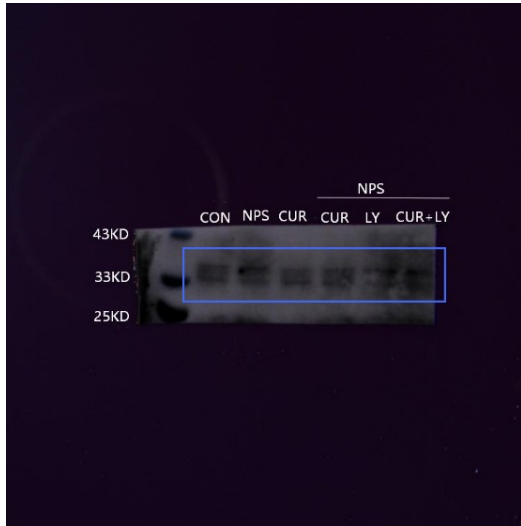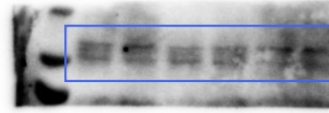

#### 4.cleaved caspase 3

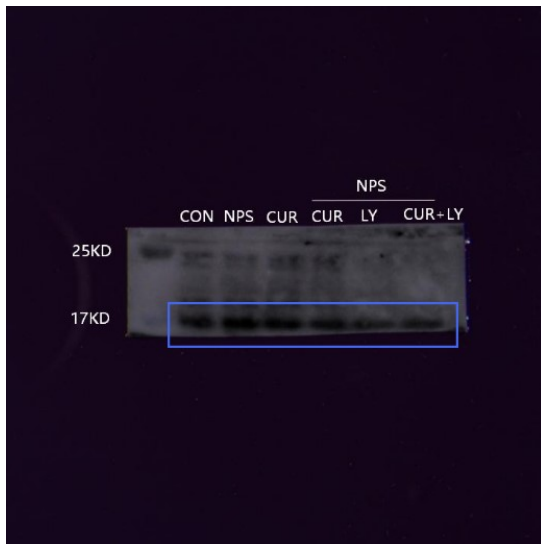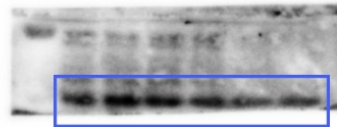

#### 5.caspase-9

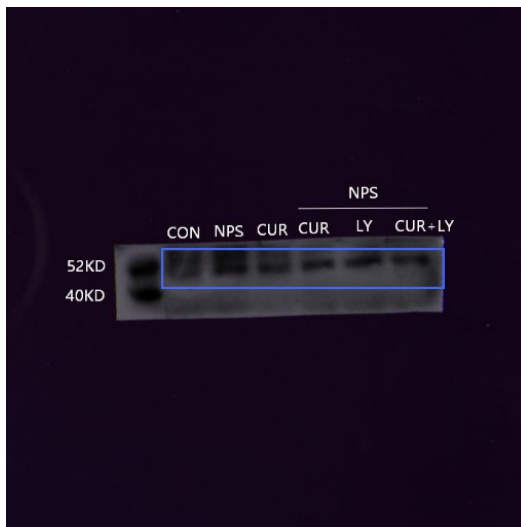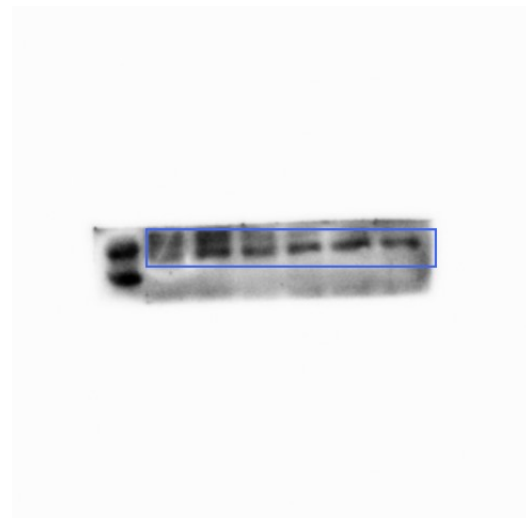

## 6. cleaved caspase-9

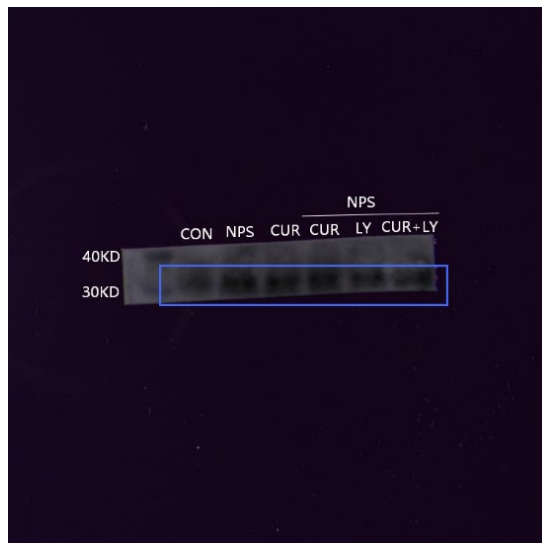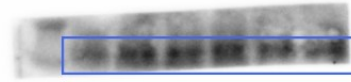

## 7. $\beta$ -actin

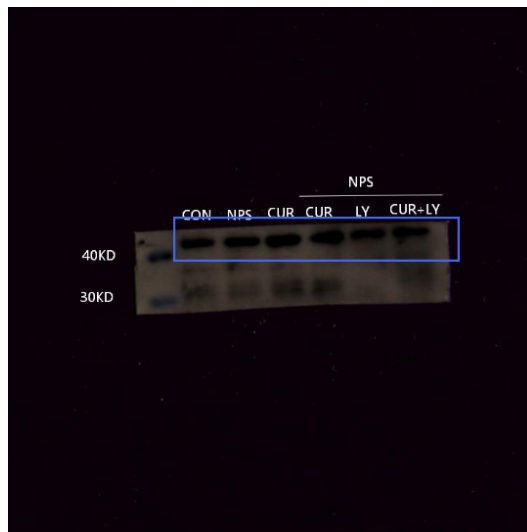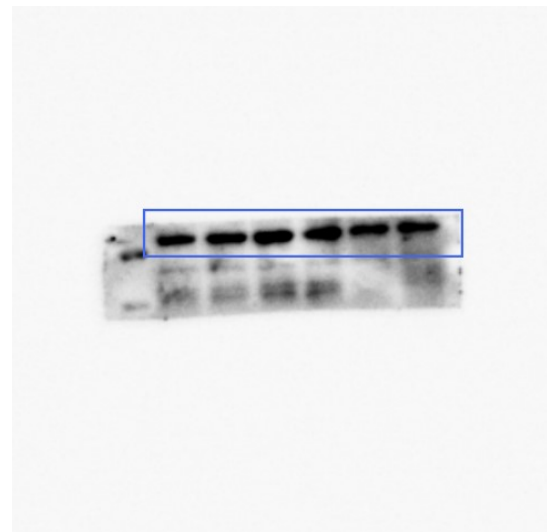

Supplement: d6fo00638h2.pdf [file d6fo00638h2.pdf]
