# Supplementary material
Source: Royal Society of Chemistry journal article supplement (doi:10.1039/d6fo00638h)
Supplement: d6fo00638h1.pdf [file d6fo00638h1.pdf]

CRE

| Con       | PS-NPs    | Cur       | NPs+Cur-L | NPs+Cur-M   | NPs+Cur-H   |
|-----------|-----------|-----------|-----------|-------------|-------------|
| 0.2162545 | 0.2588364 | 0.1965091 | 0.2220364 | 0.191309091 | 0.198072727 |
| 0.2051636 | 0.2754545 | 0.2164727 | 0.2142545 | 0.217381818 | 0.199890909 |
| 0.2046725 | 0.2724546 | 0.2046484 | 0.2474326 | 0.199753645 | 0.201343655 |

CAT

| Con       | PS-NPs    | Cur       | NPs+Cur-L | NPs+Cur-M   | NPs+Cur-H   |
|-----------|-----------|-----------|-----------|-------------|-------------|
| 106.95915 | 64.268341 | 98.602809 | 85.34407  | 83.46715888 | 92.8446952  |
| 106.95915 | 65.397657 | 100.73565 | 84.933762 | 89.00049543 | 93.59586588 |
| 109.25246 | 62.236357 | 103.25436 | 79.215375 | 85.23547568 | 94.35357458 |

SOD

| Con       | PS-NPs    | Cur       | NPs+Cur-L | NPs+Cur-M   | NPs+Cur-H   |
|-----------|-----------|-----------|-----------|-------------|-------------|
| 48.527568 | 38.966652 | 49.516835 | 42.138536 | 43.79217618 | 49.91341001 |
| 47.319213 | 38.694538 | 49.081982 | 42.84534  | 42.32310302 | 48.27643159 |
| 48.769239 | 37.606085 | 47.922375 | 41.667334 | 43.85402985 | 47.97879916 |

TNF- $\alpha$

| Con       | PS-NPs    | Cur       | NPs+Cur-L | NPs+Cur-M  | NPs+Cur-H  |
|-----------|-----------|-----------|-----------|------------|------------|
| 265.02501 | 609.50579 | 157.7958  | 606.43815 | 586.49849  | 565.02501  |
| 241.2508  | 663.9564  | 163.93108 | 595.70141 | 588.79922  | 541.2508   |
| 253.13791 | 636.7311  | 160.86344 | 601.06978 | 587.648855 | 553.137905 |

MASSON

| Con    | PS-NPs | Cur    | NPs+Cur-L | NPs+Cur-M | NPs+Cur-H |
|--------|--------|--------|-----------|-----------|-----------|
| 14.048 | 25.575 | 15.926 | 22.118    | 22.034    | 20.078    |
| 13.457 | 27.987 | 14.724 | 23.763    | 21.052    | 19.724    |
| 16.836 | 26.726 | 14.835 | 22.092    | 24.724    | 19.981    |
| 14.246 | 28.983 | 18.346 | 21.846    | 23.098    | 19.135    |
| 17.763 | 25.136 | 15.146 | 24.835    | 22.162    | 18.872    |
| 16.36  | 27.726 | 15.826 | 24.156    | 21.76     | 20.815    |
| 12.983 | 25.983 | 16.136 | 23.714    | 20.725    | 22.815    |
| 15.857 | 27.167 | 17.872 | 21.093    | 22.762    | 21.921    |
| 14.842 | 24.92  | 12.267 | 22.761    | 21.135    | 22.134    |
| 16.093 | 25.169 | 14.425 | 21.826    | 20.357    | 19.267    |
| 13.873 | 26.721 | 14.237 | 21.035    | 22.816    | 19.427    |

PCR

|     | Con | Con | Con | PS-NPs | PS-NPs      | PS-NPs      |             |
|-----|-----|-----|-----|--------|-------------|-------------|-------------|
| BAX |     | 1   | 1   | 1      | 1.717622395 | 1.699876191 | 1.819675393 |

|                   |   |   |   |               |              |             |
|-------------------|---|---|---|---------------|--------------|-------------|
| BCL-2             | 1 | 1 | 1 | 0.690668384   | 0.699158228  | 0.537389067 |
| Caspase 3         | 1 | 1 | 1 | 1.82972067    | 1.608305141  | 1.670331637 |
| Caspase 9         | 1 | 1 | 1 | 1.510367515   | 1.462018106  | 1.700224122 |
| IKK               | 1 | 1 | 1 | 1.495284019   | 1.585428838  | 1.706576089 |
| NF- $\kappa$ B P6 | 1 | 1 | 1 | 1.73547659136 | 1.6341546555 | 1.887414601 |
| IKB $\alpha$      | 1 | 1 | 1 | 0.5237534     | 0.614458735  | 0.663135473 |
| TNF- $\alpha$     | 1 | 1 | 1 | 2.506722918   | 2.718092999  | 2.4746484   |
| IL-1 $\beta$      | 1 | 1 | 1 | 1.5374545654  | 1.787436534  | 1.812458909 |
| IL-6              | 1 | 1 | 1 | 1.84636612    | 1.96083366   | 2.050062518 |

WB

|                   | Con | Con | Con | PS-NPs      | PS-NPs      | PS-NPs      |
|-------------------|-----|-----|-----|-------------|-------------|-------------|
| BAX/BCL-2         | 1   | 1   | 1   | 2.02185499  | 1.517239353 | 2.147192424 |
| CC3/C3            | 1   | 1   | 1   | 1.640240185 | 1.615005097 | 1.614419752 |
| CC9/C9            | 1   | 1   | 1   | 1.155260836 | 1.262484748 | 1.25901809  |
| P-PI3K/PI         | 1   | 1   | 1   | 2.798704374 | 2.9885118   | 3.168184293 |
| P-AKT/AKT         | 1   | 1   | 1   | 1.26250606  | 1.324452284 | 1.469501152 |
| P-IKK/IKK         | 1   | 1   | 1   | 1.341898838 | 1.569427882 | 1.459961269 |
| p-IKB $\alpha$ /I | 1   | 1   | 1   | 1.975540912 | 2.402863736 | 2.391270617 |
| P-P65/P65         | 1   | 1   | 1   | 1.95272061  | 2.196706866 | 2.156571684 |
| TNF $\alpha$      | 1   | 1   | 1   | 1.38779607  | 1.271419937 | 1.201538924 |
| IL-1 $\beta$      | 1   | 1   | 1   | 1.105199295 | 1.291025437 | 1.162076507 |
| IL-6              | 1   | 1   | 1   | 1.194595144 | 1.190597556 | 1.258900857 |

BUN

| Con         | PS-NPs      | Cur         | NPs+Cur-L   | NPs+Cur-M   |
|-------------|-------------|-------------|-------------|-------------|
| 5.087719298 | 7.257309942 | 5.432748538 | 6.614035088 | 6.128654971 |
| 5.438596491 | 7.666666667 | 4.959064327 | 6.789473684 | 6.304093567 |
| 5.438596491 | 7.783625731 | 4.900584795 | 7.081871345 | 6.713450292 |

GSH-PX

| Con         | PS-NPs      | Cur         | NPs+Cur-L   | NPs+Cur-M   |
|-------------|-------------|-------------|-------------|-------------|
| 288.457492  | 193.4044312 | 282.1954071 | 203.5167848 | 248.4497659 |
| 274.4547011 | 180.7910987 | 292.2738144 | 213.8639479 | 240.2591143 |
| 277.2552593 | 187.097765  | 268.7575305 | 213.8639479 | 251.1799831 |

T-AOC

| Con         | PS-NPs      | Cur         | NPs+Cur-L   | NPs+Cur-M   |
|-------------|-------------|-------------|-------------|-------------|
| 4.071289612 | 2.201381662 | 4.19037751  | 3.062737048 | 3.471658314 |
| 4.623534577 | 2.374341535 | 4.513343665 | 2.564364275 | 3.943475426 |
| 4.745245375 | 2.284543466 | 4.942135437 | 2.523536454 | 3.733254365 |

IL-1  $\beta$

| Con       | PS-NPs     | Cur       | NPs+Cur-L | NPs+Cur-M |
|-----------|------------|-----------|-----------|-----------|
| 760.22968 | 932.96596  | 213.43564 | 975.4354  | 690.80848 |
| 752.47084 | 1173.89836 | 199.95976 | 981.96916 | 767.1718  |
| 756.35026 | 1053.43216 | 206.6977  | 978.70228 | 728.99014 |

Kidney injury score

| Con | PS-NPs | Cur | NPs+Cur-L | NPs+Cur-M |
|-----|--------|-----|-----------|-----------|
| 2   | 6      | 1   | 5         | 5         |
| 0   | 8      | 0   | 6         | 4         |
| 2   | 6      | 0   | 5         | 5         |
| 0   | 7      | 0   | 5         | 4         |
| 0   | 6      | 0   | 7         | 4         |
| 1   | 5      | 0   | 5         | 3         |
| 0   | 8      | 1   | 4         | 5         |
| 0   | 9      | 2   | 5         | 5         |
| 0   | 6      | 0   | 6         | 3         |
| 0   | 5      | 2   | 5         | 3         |
| 0   | 5      | 1   | 5         | 4         |

| Cur         | Cur         | Cur         | NPs+Cur-L  | NPs+Cur-L   | NPs+Cur-L  |
|-------------|-------------|-------------|------------|-------------|------------|
| 1.073804227 | 1.058547642 | 1.124860551 | 1.47052991 | 1.596410156 | 1.68147401 |

|             |              |              |              |              |              |
|-------------|--------------|--------------|--------------|--------------|--------------|
| 1.08562231  | 1.137742265  | 1.079371843  | 0.693291393  | 0.711475048  | 0.783724804  |
| 1.256573233 | 1.097372808  | 1.22884715   | 1.582005296  | 1.693439781  | 1.764877346  |
| 1.027224763 | 1.151416532  | 1.257982896  | 1.59480096   | 1.37337015   | 1.42030797   |
| 1.111428    | 1.3061895    | 1.2716381    | 1.596266     | 1.463673     | 1.5285864    |
| 1.423405635 | 1.2124731478 | 1.200076141  | 1.6469134671 | 1.4492175478 | 1.5347015709 |
| 0.967351235 | 0.9852546    | 1.024376352  | 0.802524372  | 0.752416458  | 0.814562462  |
| 1.2935453   | 1.393643     | 1.16619608   | 1.95215293   | 1.52084012   | 1.6571877    |
| 1.123318734 | 1.2834538768 | 1.1735163581 | 1.5453834893 | 1.6328670138 | 1.5680759639 |
| 1.296328003 | 1.304988577  | 1.423354295  | 1.531938224  | 1.81001274   | 1.765325786  |

| Cur         | Cur         | Cur         | NPs+Cur-L   | NPs+Cur-L   | NPs+Cur-L   |
|-------------|-------------|-------------|-------------|-------------|-------------|
| 1.17310791  | 1.191349993 | 1.357696364 | 1.90228375  | 1.643373341 | 1.985409572 |
| 0.618382796 | 0.9052699   | 0.988304699 | 1.648522406 | 1.573708425 | 1.375959712 |
| 1.073878186 | 1.152500059 | 0.867050817 | 1.080187008 | 1.026780177 | 0.934944716 |
| 0.814609606 | 0.971363292 | 0.713065797 | 1.670061973 | 1.936987895 | 1.7806091   |
| 1.126217851 | 1.097111736 | 1.166710769 | 1.5215995   | 1.233425272 | 1.426852086 |
| 1.066081981 | 0.970017614 | 0.878104433 | 1.255212038 | 0.950845551 | 0.933625608 |
| 1.078279227 | 1.078250753 | 1.61533918  | 2.28103211  | 1.623273847 | 2.31496707  |
| 1.697934363 | 1.653589499 | 1.422356114 | 2.1503179   | 2.157630995 | 1.903807092 |
| 0.976479842 | 1.146982202 | 1.095455454 | 1.186347864 | 1.274963243 | 1.077402702 |
| 1.123657456 | 1.08181739  | 1.060138527 | 1.196663798 | 1.070399527 | 1.182889441 |
| 0.99729426  | 1.058841427 | 0.8545893   | 1.161286523 | 1.17924251  | 1.21605432  |

AKP

| NPs+Cur-H   | Con         | PS-NPs      | Cur         | NPs+Cur-L   |
|-------------|-------------|-------------|-------------|-------------|
| 6.608187135 | 337.4425263 | 577.3980439 | 359.0466886 | 450.771693  |
| 6.81754386  | 353.8136401 | 565.4736274 | 390.053949  | 461.6897387 |
| 6.51461988  | 345.2046923 | 560.5384382 | 374.1156376 | 488.7788539 |

MDA

| NPs+Cur-H   | Con         | PS-NPs      | Cur         | NPs+Cur-L   |
|-------------|-------------|-------------|-------------|-------------|
| 276.8643054 | 17.30344872 | 21.89821108 | 17.47023933 | 18.88878087 |
| 247.6185168 | 17.01505791 | 23.36545536 | 15.91348533 | 19.73038958 |
| 258.4066851 | 19.3221844  | 21.758524   | 15.34594533 | 20.7894763  |

kim-1

| NPs+Cur-H   | Con      | PS-NPs   | Cur      | NPs+Cur-L |
|-------------|----------|----------|----------|-----------|
| 4.700356815 | 101.2931 | 282.1565 | 119.6279 | 231.3151  |
| 4.934523424 | 127.5442 | 294.6587 | 96.7072  | 244.2314  |
| 4.654345265 | 133.7953 | 268.8261 | 107.1257 | 268.8173  |

IL-6

| NPs+Cur-H | Con        | PS-NPs     | Cur       | NPs+Cur-L  |
|-----------|------------|------------|-----------|------------|
| 755.32936 | 104.970142 | 278.743288 | 82.948726 | 263.339714 |
| 654.46444 | 105.326294 | 288.565212 | 77.962598 | 278.832326 |
| 704.8969  | 105.148218 | 278.65425  | 80.455662 | 271.08602  |

NPs+Cur-H

- 1
- 3
- 2
- 1
- 2
- 2
- 1
- 2
- 1
- 2
- 1

| NPs+Cur-M   | NPs+Cur-M   | NPs+Cur-M   | NPs+Cur-H   | NPs+Cur-H   | NPs+Cur-H   |
|-------------|-------------|-------------|-------------|-------------|-------------|
| 1.394589203 | 1.147616461 | 1.200746809 | 1.052337576 | 1.058957929 | 1.147978162 |

|              |              |              |              |              |              |
|--------------|--------------|--------------|--------------|--------------|--------------|
| 0.822872662  | 0.793068032  | 0.595755799  | 1.032233758  | 0.8553854    | 0.97744183   |
| 1.300458748  | 1.47186766   | 1.488912353  | 1.032366379  | 0.937823397  | 0.944870508  |
| 1.3282718    | 1.1093529    | 1.24807602   | 1.06642425   | 1.021218     | 0.799461     |
| 1.4802591    | 1.1942538    | 1.355156     | 1.2963324    | 1.30284      | 1.21296      |
| 1.4325019350 | 1.1329507357 | 1.2936418036 | 1.139247803  | 1.3073519650 | 1.212835325  |
| 0.8242351    | 0.7974245    | 0.772543724  | 0.894252462  | 0.8745636    | 0.851834235  |
| 1.4964892    | 1.3756582    | 1.348869     | 1.243185     | 1.304772     | 1.19653      |
| 1.4983265860 | 1.2678196937 | 1.6315681527 | 1.2461635704 | 1.4136513670 | 1.2667057692 |
| 1.55574733   | 1.59886654   | 1.7360886    | 1.391983018  | 0.99003124   | 1.3936       |

| NPs+Cur-M   | NPs+Cur-M   | NPs+Cur-M   | NPs+Cur-H   | NPs+Cur-H   | NPs+Cur-H   |
|-------------|-------------|-------------|-------------|-------------|-------------|
| 1.317207635 | 1.619980187 | 1.354337958 | 1.016810913 | 0.976704789 | 1.4223978   |
| 1.577038671 | 1.459791051 | 1.218305355 | 1.577038671 | 1.459791051 | 1.218305355 |
| 0.866462809 | 1.031570575 | 0.85965459  | 0.904760771 | 0.973757474 | 0.805690489 |
| 1.26193532  | 1.29734438  | 0.927246198 | 0.703596569 | 0.87233771  | 0.636052174 |
| 1.369290928 | 1.297463534 | 1.21842194  | 1.045732565 | 0.959893033 | 1.133078424 |
| 0.9056442   | 0.892306606 | 1.056469319 | 0.73612519  | 1.056891002 | 0.8204767   |
| 1.533228008 | 1.661879202 | 1.66047126  | 0.953228752 | 1.012487886 | 1.134432483 |
| 1.63084982  | 1.870539111 | 1.9025558   | 1.203966967 | 1.254868131 | 0.78037576  |
| 1.2807199   | 1.095410065 | 1.171488093 | 1.068986669 | 1.190098641 | 0.933382998 |
| 1.07692561  | 1.155228348 | 0.903329012 | 0.961633    | 0.97521432  | 1.059828522 |
| 1.185396206 | 1.013554167 | 1.204879957 | 1.063707214 | 1.185823567 | 1.01614656  |

NPs+Cur-M NPs+Cur-H  
437.8763 397.29336  
459.62749 412.01117  
443.19325 405.58568

NPs+Cur-M NPs+Cur-H  
18.181958 17.555772  
17.041384 18.04042  
18.603679 17.365138

NPs+Cur-M NPs+Cur-H  
207.1433 157.1345  
192.5574 179.9671  
222.9759 148.7997

NPs+Cur-M NPs+Cur-H  
230.48469 230.48469  
198.1639 187.30126  
214.3243 208.89298

1749

Concentration of NPS

| Concentra | 0 | 3.125      | 6.25        | 12.5       | 25         |
|-----------|---|------------|-------------|------------|------------|
| Cell viab | 1 | 0.99460361 | 0.973148458 | 0.91603987 | 0.88061004 |

Concentration of Cur

| Concentra | 0 | 5           | 10          | 15          | 20         |
|-----------|---|-------------|-------------|-------------|------------|
| Cell viab | 1 | 0.938034983 | 0.847785635 | 0.791049498 | 0.74506885 |

Relative cell viablity

| Cur ( $\mu$ g) | 0            | 5            | 10           | 15           | 20           |
|----------------|--------------|--------------|--------------|--------------|--------------|
| PS-NPs (100)   | 100          | 100          | 100          | 100          | 100          |
|                | 1            | 0.746683524  | 0.875347535  | 0.796750183  | 0.818762947  |
|                | 0.9923572846 | 0.7286593285 | 0.8435428365 | 0.8032578265 | 0.7932562376 |
|                | 0.9835623895 | 0.7632573296 | 0.883256833  | 0.7732957823 | 0.7723957893 |

PCR

|                   | Con | Con | Con | PS-NPs       | PS-NPs       |
|-------------------|-----|-----|-----|--------------|--------------|
| BAX               | 1   | 1   | 1   | 1.652357234  | 1.578345235  |
| BCL-2             | 1   | 1   | 1   | 0.764254346  | 0.696352525  |
| Caspase 3         | 1   | 1   | 1   | 1.894534267  | 1.832432544  |
| Caspase 9         | 1   | 1   | 1   | 1.753245234  | 1.682534627  |
| IKK               | 1   | 1   | 1   | 1.945347524  | 1.8634572462 |
| NF- $\kappa$ B P6 | 1   | 1   | 1   | 1.7543516483 | 1.7142626727 |
| TNF- $\alpha$     | 1   | 1   | 1   | 1.426485164  | 1.763515347  |
| IL-1 $\beta$      | 1   | 1   | 1   | 1.3548267493 | 1.6351513737 |
| IL-6              | 1   | 1   | 1   | 1.3946693413 | 1.4232365488 |

SOD

| Con      | PS-NPs  | Cur      | NPs+Cur |
|----------|---------|----------|---------|
| 15.32436 | 4.28426 | 11.78347 | 8.82467 |
| 13.73527 | 7.73626 | 13.26846 | 9.73642 |
| 13.83254 | 5.23652 | 12.82463 | 9.83462 |

GSH

| Con         |
|-------------|
| 40.33396523 |
| 44.40075828 |
| 45.71182726 |

TNF- $\alpha$

| Con     | PS-NPs   | Cur      | NPs+Cur  |
|---------|----------|----------|----------|
| 5.94762 | 12.0829  | 2.87998  | 7.48144  |
| 5.94762 | 16.68436 | 6.71453  | 10.54908 |
| 2.11307 | 13.31599 | 4.797255 | 9.01526  |

IL-6

| Con      |
|----------|
| 1.2315   |
| 2.834184 |
| 2.032842 |

Tail Length

| Con | PS-NPs | Cur | NPs+Cur |
|-----|--------|-----|---------|
| 2   | 227    | 6   | 62      |

Tail DNA Perc

| Con        |
|------------|
| 4.18182836 |

|   |     |   |    |             |
|---|-----|---|----|-------------|
| 3 | 252 | 5 | 53 | 3.240917682 |
| 3 | 208 | 7 | 75 | 3.782169196 |
| 3 | 189 | 6 | 57 | 3.428502809 |
| 3 | 250 | 2 | 80 | 4.075071619 |
| 2 | 233 | 7 | 54 | 5.441704221 |

ROS

| Con      | PS-NPs    | Cur      | NPs+Cur   | JC-1<br>Con |
|----------|-----------|----------|-----------|-------------|
| 920.959  | 53014.425 | 1668.194 | 41058.4   | 3.923468438 |
| 1002.834 | 48452.835 | 1783.835 | 30876.357 | 3.787263467 |
| 1326.832 | 46826.134 | 3925.246 | 38235.831 | 3.477714794 |

WB

|           | Con | Con | Con | PS-NPs      | PS-NPs      |
|-----------|-----|-----|-----|-------------|-------------|
| BAX/BCL-2 | 1   | 1   | 1   | 2.02185499  | 1.517239353 |
| CC3/C3    | 1   | 1   | 1   | 1.260944948 | 1.26989053  |
| CC9/C9    | 1   | 1   | 1   | 1.286349972 | 1.246945641 |
| P-PI3K/PI | 1   | 1   | 1   | 1.39834684  | 1.430786794 |
| P-AKT/AKT | 1   | 1   | 1   | 1.250313992 | 1.348441901 |
| P-IKK/IKK | 1   | 1   | 1   | 1.250313992 | 1.345838868 |
| P-P65/P65 | 1   | 1   | 1   | 1.448731524 | 1.289624791 |

|             |             |             |            |
|-------------|-------------|-------------|------------|
| 50          | 100         | 200         | 400        |
| 0.831443019 | 0.804599899 | 0.667286912 | 0.59376626 |

|             |             |
|-------------|-------------|
| 25          | 30          |
| 0.627279494 | 0.554893934 |

|               |                   |
|---------------|-------------------|
| 25            | 30                |
| 100           | 100               |
| 0.749368724   | 0.6252239572658   |
| 0.76497582369 | 0.6759896298569   |
| 0.77558246598 | 0.663256948659247 |

| PS-NPs       | Cur          | Cur          | Cur         | NPs+Cur    | NPs+Cur    | NPs+Cur   |
|--------------|--------------|--------------|-------------|------------|------------|-----------|
| 1.783264573  | 1.0563452    | 1.0247351    | 1.108764342 | 1.477423   | 1.445247   | 1.573452  |
| 0.723464574  | 0.974562353  | 1.034346458  | 1.012436475 | 0.834346   | 0.852435   | 0.724366  |
| 1.875362645  | 1.042154363  | 1.013547636  | 1.026583277 | 1.353462   | 1.45262791 | 1.4784724 |
| 1.786345264  | 0.965234282  | 0.925362647  | 0.892164735 | 1.467983   | 1.495749   | 1.532852  |
| 1.8335345765 | 1.2325372637 | 1.123543725  | 1.184647374 | 1.4365362  | 1.523426   | 1.493526  |
| 1.6346482690 | 1.0763626483 | 1.0179462353 | 1.105724743 | 1.32535721 | 1.42152631 | 1.3954656 |
| 1.5457846263 | 0.962346489  | 0.7456252474 | 0.864626485 | 1.64268341 | 1.46564831 | 1.5626168 |
| 1.4642749859 | 1.0752647351 | 1.0326746562 | 1.106737274 | 1.56264871 | 1.4665998  | 1.245769  |
| 1.3973627583 | 0.8772759361 | 0.9626271253 | 0.897653274 | 1.31589311 | 1.29269931 | 1.2472465 |

mda

| PS-NPs      | Cur         | NPs+Cur    | Con       | PS-NPs    | Cur       |
|-------------|-------------|------------|-----------|-----------|-----------|
| 21.70281263 | 42.3327855  | 38.1851376 | 11.379071 | 14.95308  | 10.95308  |
| 25.44946631 | 46.08770357 | 40.4871136 | 10.95308  | 15.346582 | 10.559578 |
| 23.80756526 | 49.80327706 | 37.905928  | 10.772573 | 15.772573 | 9.3790714 |

IL-1  $\beta$

| PS-NPs   | Cur     | NPs+Cur  | Con      | PS-NPs   | Cur      |
|----------|---------|----------|----------|----------|----------|
| 7.642236 | 1.2315  | 6.90935  | 26.40676 | 71.73472 | 41.51608 |
| 8.710692 | 3.90264 | 4.368412 | 24.77332 | 76.63504 | 34.1656  |
| 8.176464 | 2.56707 | 5.638881 | 25.59004 | 74.18488 | 37.84084 |

cent

| PS-NPs      | Cur         | NPs+Cur     |
|-------------|-------------|-------------|
| 83.33870916 | 3.318510566 | 42.78315093 |

Tail Moment

| Con       | PS-NPs    | Cur      |
|-----------|-----------|----------|
| 2.9786369 | 189.17887 | 7.673196 |

|             |             |             |           |           |           |
|-------------|-------------|-------------|-----------|-----------|-----------|
| 91.56641661 | 4.339421033 | 77.4950529  | 0.6927622 | 189.18095 | 0.7445792 |
| 98.97015364 | 6.694153036 | 54.61288558 | 2.090481  | 205.85792 | 0.9371814 |
| 83.73842169 | 6.655533974 | 86.05670611 | 1.1427579 | 209.34605 | 1.4658847 |
| 75.65368886 | 5.70125803  | 65.90069071 | 0.0918171 | 150.61941 | 1.7720018 |
| 98.95967673 | 6.258467051 | 58.42213963 | 0.8523134 | 163.6775  | 0.6178006 |

|             |             |             |
|-------------|-------------|-------------|
| PS-NPs      | Cur         | NPs+Cur     |
| 0.786271795 | 1.881709107 | 1.295084727 |
| 0.624657288 | 1.583427493 | 0.962436572 |
| 0.458289475 | 1.87244727  | 1.391472476 |

|             |             |             |             |          |          |          |
|-------------|-------------|-------------|-------------|----------|----------|----------|
| PS-NPs      | Cur         | Cur         | Cur         | NPs+Cur  | NPs+Cur  | NPs+Cur  |
| 2.147192424 | 1.417310791 | 1.191349993 | 1.357696364 | 1.022838 | 1.643373 | 1.540957 |
| 1.39033835  | 0.882153072 | 1.09330598  | 1.073009109 | 1.057156 | 1.112463 | 1.155192 |
| 1.335308794 | 1.15956156  | 1.070632    | 0.925789807 | 1.132255 | 1.088826 | 1.192514 |
| 1.410786794 | 0.550164655 | 0.89462952  | 0.689462952 | 1.143444 | 1.159    | 1.209    |
| 1.263603177 | 0.732505076 | 0.643970022 | 0.830947515 | 1.191136 | 1.170209 | 1.162663 |
| 1.263603177 | 1.125050762 | 0.964397002 | 1.109475148 | 1.119114 | 1.169774 | 1.137021 |
| 1.362082767 | 1.040421219 | 1.027515005 | 0.98512089  | 1.155018 | 1.069891 | 1.173929 |

NPs+LY NPs+LY NPs+LY NPs+Cur+LNPs+Cur+LNPs+Cur+LY  
 1. 468234 1. 562354 1. 395453 1. 634523 1. 5624512 1. 354675  
 0. 879573 0. 893424 0. 903416 0. 904246 0. 893235 0. 863826  
 1. 324235 1. 243636 1. 345763 1. 424333 1. 394628 1. 3759873626748  
 1. 512427 1. 535816 1. 4954189 1. 358517 1. 39752841. 47357189565235  
 1. 536826 1. 464824 1. 39563511. 36483521. 39785761. 4165246425873  
 1. 5031545 1. 496725 1. 47936161. 35648361. 49736831. 36628346538964  
 1. 535165 1. 37570981. 69842311. 3254871 1. 464688 1. 577087  
 1. 36978751. 27808791. 47665461. 37826351. 24568791. 1377078262703  
 1. 13648361. 21354681. 19835131. 17679681. 14576691. 18986264978252

TAOC

| NPs+Cur   | Con       | PS-NPs    | Cur       | NPs+Cur   |
|-----------|-----------|-----------|-----------|-----------|
| 14.166076 | 10.755724 | 5.7466537 | 8.7155735 | 8.4415808 |
| 14.166076 | 11.444655 | 5.7466537 | 9.9606554 | 9.301976  |
| 13.379071 | 10.755724 | 6.5676042 | 11.205737 | 7.4415808 |

NPs+Cur  
 40. 291  
 59. 89228  
 50. 09164

NPs+Cur  
 35.133978

41.072378  
62.804818  
49.052322  
32.43191  
40.644919

| NPs+LY    | NPs+LY    | NPs+LY    | NPs+Cur+LNPs+Cur+LNPs+Cur+LY | NPs+Cur+LNPs+Cur+LNPs+Cur+LY | NPs+Cur+LNPs+Cur+LNPs+Cur+LY |
|-----------|-----------|-----------|------------------------------|------------------------------|------------------------------|
| 1. 317208 | 1. 61998  | 1. 354338 | 1. 016811                    | 1. 767048                    | 1. 422398                    |
| 1. 182814 | 0. 972894 | 1. 095481 | 0. 952912                    | 1. 240999                    | 1. 08058                     |
| 1. 10824  | 1. 144079 | 1. 10311  | 1. 1696                      | 1. 145396                    | 1. 059958                    |
| 1. 152015 | 1. 208731 | 1. 208731 | 1. 208318                    | 1. 173329                    | 1. 123329                    |
| 1. 187852 | 1. 150335 | 1. 178242 | 1. 14185                     | 1. 162443                    | 1. 207898                    |
| 1. 187852 | 1. 098034 | 1. 117824 | 1. 14185                     | 1. 162443                    | 1. 078983                    |
| 1. 090533 | 1. 209118 | 0. 936831 | 1. 093672                    | 1. 045214                    | 1. 080775                    |
